# Supplementary material for: Use of Outpatient-Derived COVID-19 Convalescent Plasma in COVID-19 Patients Before Seroconversion
Source: PubMed Central journal article supplement (PMC8477649; doi:10.3389/fimmu.2021.739037), 2021-09-14
Supplement: Image_5.pdf [file Image_5.pdf]

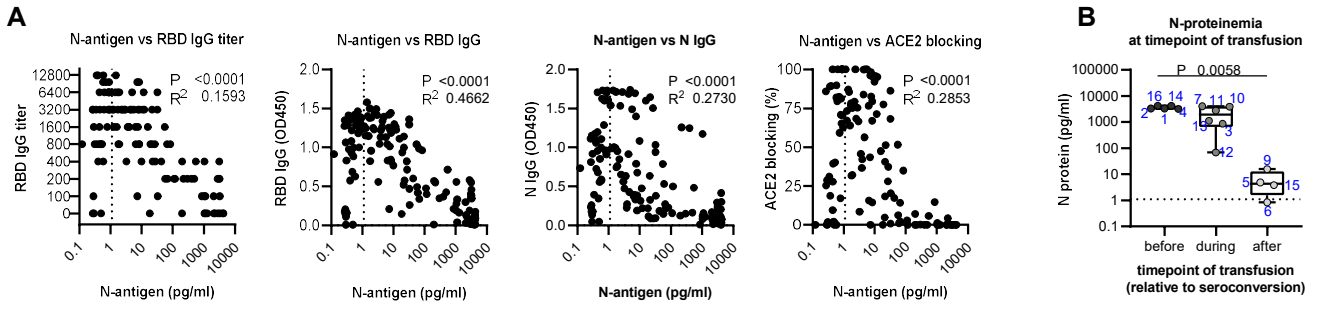

Supplementary Figure 5
